# Supplementary material for: Naphthalimide-decorated imino-phenol: supramolecular gelation and selective sensing of Fe3+ and Cu2+ ions under different experimental conditions
Source: Royal Society of Chemistry journal article supplement (doi:10.1039/d1nj00259g), 2021-01-01
Supplement: d1nj00259g1.pdf [file d1nj00259g1.pdf]

## Supporting Information

### Naphthalimide-decorated imino-phenol: Supramolecular gelation and selective sensing of Fe<sup>3+</sup> and Cu<sup>2+</sup> ions under different experimental conditions

Sumit Ghosh<sup>1</sup>, Nabajyoti Baildya<sup>1</sup>, Narendra Nath Ghosh<sup>2</sup> and Kumares Ghosh<sup>1\*</sup>

<sup>1</sup>Department of Chemistry, University of Kalyani, Kalyani-741235, India.

Email: [ghosh\\_k2003@yahoo.co.in](mailto:ghosh_k2003@yahoo.co.in)

<sup>2</sup>Department of Chemistry, University of Gour Banga, Malda-732103, India

**Table S1.** Results of gelation test for **1**.

| Solvent                                           | <b>1</b>            |
|---------------------------------------------------|---------------------|
| DMSO                                              | S                   |
| DMF                                               | S                   |
| THF                                               | S                   |
| CH <sub>3</sub> CN                                | I                   |
| CH <sub>3</sub> OH                                | I                   |
| CHCl <sub>3</sub>                                 | S                   |
| Benzene                                           | I                   |
| CHCl <sub>3</sub> : CH <sub>3</sub> OH (1:1, v/v) | P                   |
| Diethyl ether                                     | I                   |
| Hexane                                            | I                   |
| Petroleum ether                                   | I                   |
| DCM                                               | S                   |
| DMSO: H <sub>2</sub> O (1:1, v/v)                 | <b>G (10 mg/mL)</b> |
| DMF: H <sub>2</sub> O (1:1, v/v)                  | <b>G (8 mg/mL)</b>  |
| THF: H <sub>2</sub> O (1:1, v/v)                  | P                   |
| CH <sub>3</sub> CN: H <sub>2</sub> O (1:1, v/v)   | P                   |
| Diox: H <sub>2</sub> O (1:1, v/v)                 | P                   |

S = Solution; G = Gel (mgc); I = Insoluble; P = Precipitation; Gelation was primarily investigated by inversion of vial method after 10-15 mins of sample preparation ([Gelator] = 20 mg/mL).

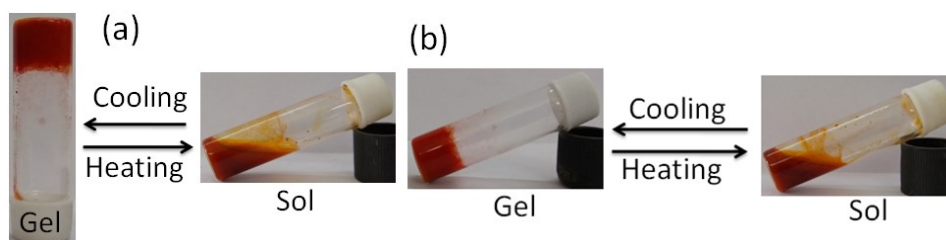

**Fig. S1.** Pictorial representation of the thermo reversibility of the (a) DMF- H<sub>2</sub>O (1:1, v/v) and (b) DMSO- H<sub>2</sub>O (1:1, v/v) gels of **1**.

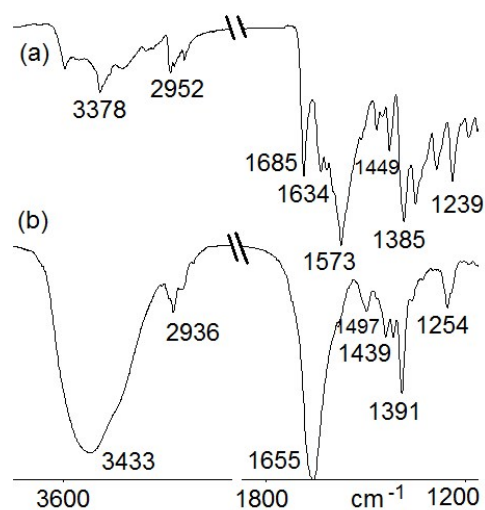

**Fig. S2.** Partial FTIR spectra of **1** in (a) amorphous and (b) gel state.

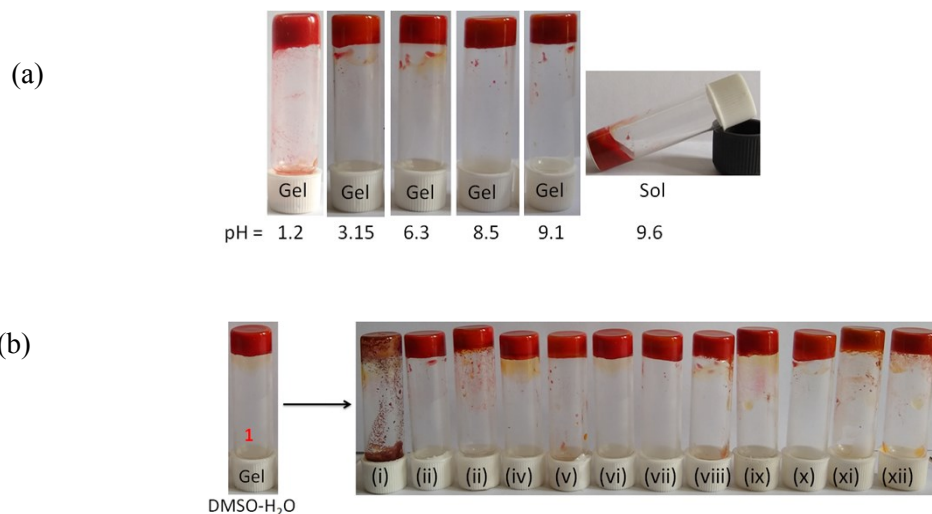

**Fig. S3.** Photograph showing the phase changes of DMF-H<sub>2</sub>O (1:1, v/v) gel of **1** at different pHs; (b) Photograph showing the phase changes of DMSO-H<sub>2</sub>O (1:1, v/v) gel of **1** (at mgc value) in the presence of 1 equiv. amount of different metal ions after 1h [(i) Fe<sup>3+</sup>, (ii) Ag<sup>+</sup>, (iii) Zn<sup>2+</sup>, (iv) Pb<sup>2+</sup>, (v) Fe<sup>2+</sup>, (vi) Hg<sup>2+</sup>, (vii) Co<sup>2+</sup>, (viii) Ni<sup>2+</sup>, (ix) Al<sup>3+</sup>, (x) Cd<sup>2+</sup>, (xi) Cu<sup>2+</sup> and (xii) Ca<sup>2+</sup> ions. Fe<sup>2+</sup> and Pb<sup>2+</sup> are used as perchlorate salts and others are as nitrate salts].

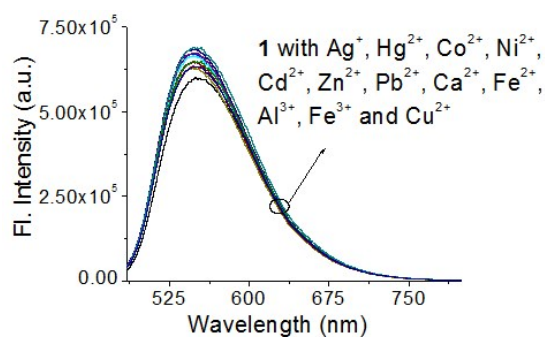

**Fig. S4.** Change in emission of compound **1** ( $c = 2.5 \times 10^{-5}$  M) upon addition of different metal ions ( $c = 1 \times 10^{-3}$  M in DMF-H<sub>2</sub>O (1:1, v/v).

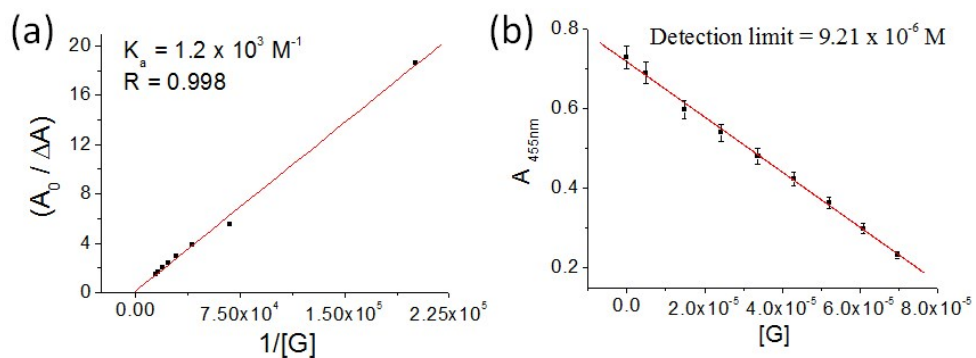

**Fig. S5.** (a) Benesi–Hildebrand plot and (b) detection limit of **1** ( $c = 2.5 \times 10^{-5}$  M) for Cu<sup>2+</sup> ion at 455 nm ( $c = 1.0 \times 10^{-3}$  M) in CH<sub>3</sub>CN from UV-vis titration.

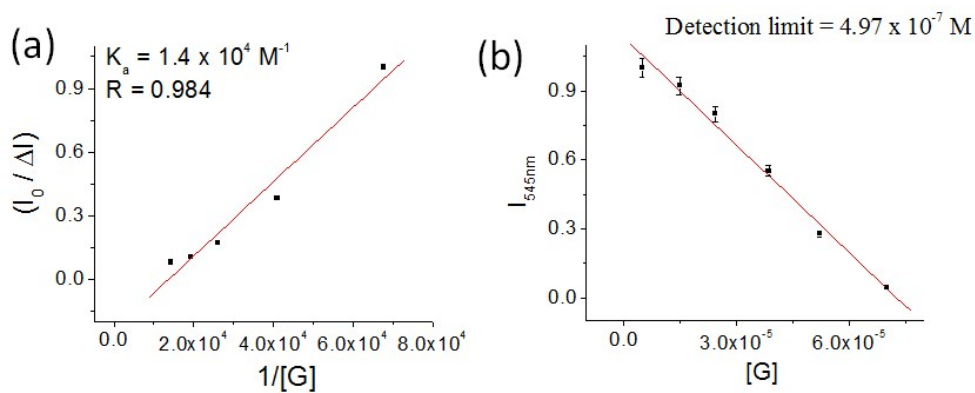

**Fig. S6.** (a) Benesi–Hildebrand plot and (b) detection limit of **1** ( $c = 2.5 \times 10^{-5}$  M) for Cu<sup>2+</sup> ion at 545 nm ( $c = 1.0 \times 10^{-3}$  M) in CH<sub>3</sub>CN from fluorescence titration.

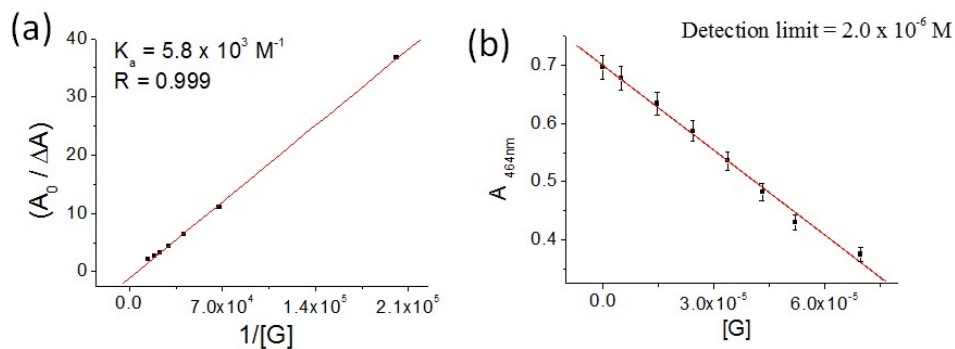

**Fig. S7.** (a) Benesi–Hildebrand plot, (b) detection limit of **1** ( $c = 2.5 \times 10^{-5}$  M) for  $\text{Cu}^{2+}$  ion at 464 nm ( $c = 1.0 \times 10^{-3}$  M) in  $\text{CH}_3\text{CN}:\text{H}_2\text{O}$  (4:1, v/v) from UV-vis titration.

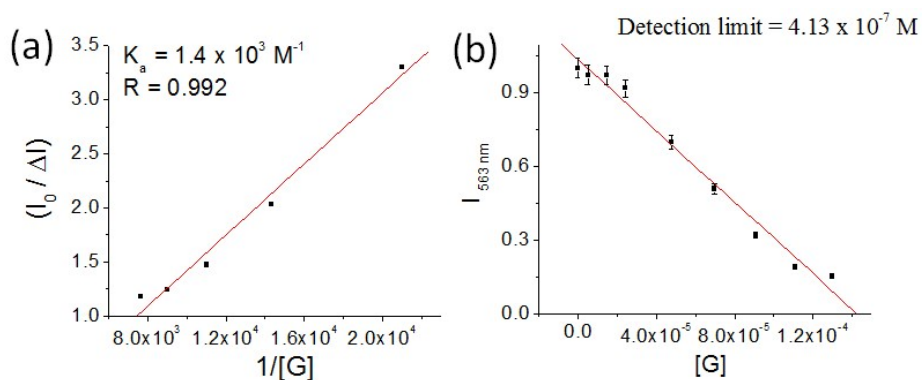

**Fig. S8.** (a) Benesi–Hildebrand plot and (b) detection limit of **1** ( $c = 2.5 \times 10^{-5}$  M) for  $\text{Cu}^{2+}$  ion at 563 nm ( $c = 1.0 \times 10^{-3}$  M) in  $\text{CH}_3\text{CN}:\text{H}_2\text{O}$  (4:1, v/v) from fluorescence titration.

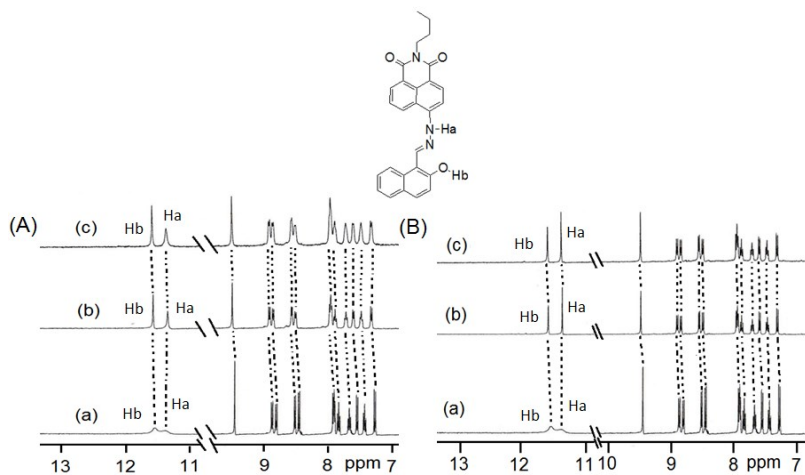

**Fig. S9.** Partial  $^1\text{H}$  NMR (400 MHz,  $d_6$ -DMSO) of (A) (a) compound **1** ( $c = 6.8 \times 10^{-3}$  M), (b) **1** with 1 equiv.  $\text{Cu}(\text{ClO}_4)_2$  and (c) **1** with 2 equiv.  $\text{Cu}(\text{ClO}_4)_2$  and (B) (a) compound **1** ( $c = 6.8 \times 10^{-3}$  M), (b) **1** with 1 equiv.  $\text{Fe}(\text{ClO}_4)_3$  and (c) **1** with 2 equiv.  $\text{Fe}(\text{ClO}_4)_3$ .

**Table S2.** Simulated absorption wavelengths ( $\lambda_{max}$  in nm), oscillator strengths ( $f$ ), and the composition of the corresponding electronic transitions (H = HOMO; L = LUMO) calculated using B3LYP/6-31g(d) for non aggregated forms and B3LYP-D3 dispersion corrected hybrid function for aggregated forms.

| Compound                                              | $\lambda_{max}$        | $f$  | $\epsilon$<br>( $10^4$ ) | Main compositions<br>(contribution)    |
|-------------------------------------------------------|------------------------|------|--------------------------|----------------------------------------|
| <b>1 in DMF</b>                                       | 352 (expt)             | 0.28 | 2.84                     | H→L+3 (87%)                            |
|                                                       | 423 (expt)             | 0.35 | 2.36                     | H-2→L (66%), H→L+1 (25%)               |
|                                                       | 648 (expt)             | 0.56 | 1.54                     | H→L (100%)                             |
| <b>1 in DMF-1H<sub>2</sub>O</b>                       | 492 (473) <sup>a</sup> | 0.74 | 2.03                     | H→L (99%)                              |
| <b>1 in DMF-2H<sub>2</sub>O</b>                       | 500 (473) <sup>a</sup> | 0.78 | 1.99                     | H→L (99%)                              |
| <b>1 aggregated DMF-H<sub>2</sub>O</b>                | 432 (448) <sup>a</sup> | 0.51 | 2.31                     | H→L (57%), H→L+1 (41%)                 |
| <b>1 aggregated water bridging DMF-H<sub>2</sub>O</b> | 433 (448) <sup>a</sup> | 0.27 | 2.31                     | H-1→L (47%), H→L+1 (38%)               |
| <b>1 in CH<sub>3</sub>CN</b>                          | 479 (473) <sup>a</sup> | 0.77 | 2.08                     | H→L (99%)                              |
| <b>1 with Cu<sup>2+</sup> in CH<sub>3</sub>CN</b>     | 497 (473) <sup>a</sup> | 0.12 | 2.01                     | H-2→L (18%), H→L (20%),<br>H→L+1 (28%) |

**Table S3:** Reported structures for Cu<sup>2+</sup> sensing in solution phase by imino-phenol compounds.

| Entry | Structure of sensor                                                                 | Detection media | solvent                             | Detection limit | Interference from other metal ions | Ref. |
|-------|-------------------------------------------------------------------------------------|-----------------|-------------------------------------|-----------------|------------------------------------|------|
| 1     | 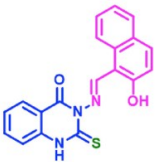 | solution        | DMSO:H <sub>2</sub> O<br>(1:9, v/v) | 20 nM           | -                                  | 1    |

|   |                                                                                     |          |                                                   |                                                            |                  |   |
|---|-------------------------------------------------------------------------------------|----------|---------------------------------------------------|------------------------------------------------------------|------------------|---|
| 2 | 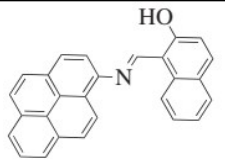   | Solution | DMSO:H <sub>2</sub> O<br>(8:2, v/v)               | 2.17 x 10 <sup>-6</sup> M<br><br>3.19 x 10 <sup>-6</sup> M | Fe <sup>3+</sup> | 2 |
| 3 |    | Solution | CH <sub>3</sub> CN                                | -                                                          | -                | 3 |
| 4 |    | Solution | CH <sub>3</sub> CN:H <sub>2</sub> O<br>(8:2, v/v) | 5 x 10 <sup>-6</sup> M                                     | -                | 4 |
| 5 |   | Solution | CH <sub>3</sub> CN:H <sub>2</sub> O<br>(2:3, v/v) | 2.95 x 10 <sup>-5</sup> M                                  | -                | 5 |
| 6 |  | Solution | CH <sub>3</sub> CN                                | 2x 10 <sup>-6</sup> M                                      | -                | 6 |
| 7 |  | Solution | DMSO:H <sub>2</sub> O<br>(3:7, v/v)               | 2.4x10 <sup>-6</sup> M                                     | -                | 7 |
| 8 |  | Solution | THF:H <sub>2</sub> O<br>(9:1, v/v)                | 1 x 10 <sup>-6</sup> M                                     | -                | 8 |
| 9 |  | Solution | CH <sub>3</sub> CN                                | -                                                          | -                | 9 |

|           |                                                                                     |          |                                                |                           |                                     |    |
|-----------|-------------------------------------------------------------------------------------|----------|------------------------------------------------|---------------------------|-------------------------------------|----|
| 10        | 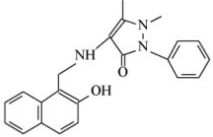   | Solution | Aqueous solution                               | -                         | -                                   | 10 |
| 11        |    | Solution | MeOH:H <sub>2</sub> O (6:4, v/v)               | 1 × 10 <sup>-5</sup> M    | -                                   | 11 |
| 12        |    | Solution | CH <sub>3</sub> CN                             | 9.8 × 10 <sup>-7</sup> M  | Fe <sup>3+</sup>                    | 12 |
| 13        |    | Solution | CH <sub>3</sub> CN                             | 5.99 × 10 <sup>-9</sup> M | Fe <sup>3+</sup> , Hg <sup>2+</sup> | 13 |
| 14        |    | Solution | Tris-buffer (25 mM, pH = 7.4) solution         | 11.2 nM                   | -                                   | 14 |
| 15        |   | Solution | EtOH:H <sub>2</sub> O (3:1, v/v)               | -                         | -                                   | 15 |
| This work |  | Solution | CH <sub>3</sub> CN:H <sub>2</sub> O (4:1, v/v) | 4.13 × 10 <sup>-7</sup> M | -                                   | -  |

**Table S4:** Reported structures for Fe<sup>3+</sup> sensing in gel phase.

| Entry | Gelator structure                                                                   | Detection media | solvent          | Sensing mechanism     | Interference from other metal ions | Ref. |
|-------|-------------------------------------------------------------------------------------|-----------------|------------------|-----------------------|------------------------------------|------|
| 1     | 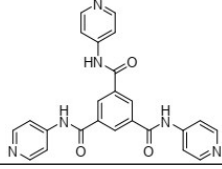 | Gel             | H <sub>2</sub> O | Sol to gel transition | Fe <sup>2+</sup>                   | 16   |

|   |                                                                                     |     |                                                   |                                                |                                     |    |
|---|-------------------------------------------------------------------------------------|-----|---------------------------------------------------|------------------------------------------------|-------------------------------------|----|
| 2 | 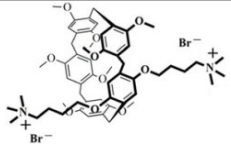   | Gel | H <sub>2</sub> O                                  | Fluorescence OFF<br>Gel-to-Gel state           | -                                   | 17 |
| 3 |    | Gel | CH <sub>3</sub> CN:H <sub>2</sub> O<br>(1:1, v/v) | Visual detection through gel-to-sol transition | Cu <sup>2+</sup>                    | 18 |
| 4 |    | Gel | CH <sub>3</sub> CN:H <sub>2</sub> O<br>(1:1, v/v) | Visual detection through gel-to-sol transition | -                                   | 18 |
| 5 |    | Gel | DMSO:H <sub>2</sub> O<br>(1:1, v/v)               | Visual detection through color change          | -                                   | 18 |
| 6 |  | Gel | CHCl <sub>3</sub> :MeOH<br>(3:1, v/v)             | Visual detection through sol-to-gel transition | Ag <sup>+</sup>                     | 19 |
| 7 |  | Gel | CH <sub>3</sub> CN                                | Visual detection through gel-to-gel transition | Hg <sup>2+</sup> , Cu <sup>2+</sup> | 13 |
| 8 |  | Gel | MeOH                                              | Visual detection through gel-to-gel transition | -                                   | 20 |



|           |                                                                                   |     |                                 |                                                |                  |   |
|-----------|-----------------------------------------------------------------------------------|-----|---------------------------------|------------------------------------------------|------------------|---|
| This work | 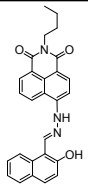 | Gel | DMF:H <sub>2</sub> O (1:1, v/v) | Visual detection through Gel-to sol transition | Fe <sup>3+</sup> | - |
|-----------|-----------------------------------------------------------------------------------|-----|---------------------------------|------------------------------------------------|------------------|---|

<sup>1</sup>H NMR (CDCl<sub>3</sub> with 1 drop *d*<sub>6</sub>-DMSO, 400 MHz) of **1**

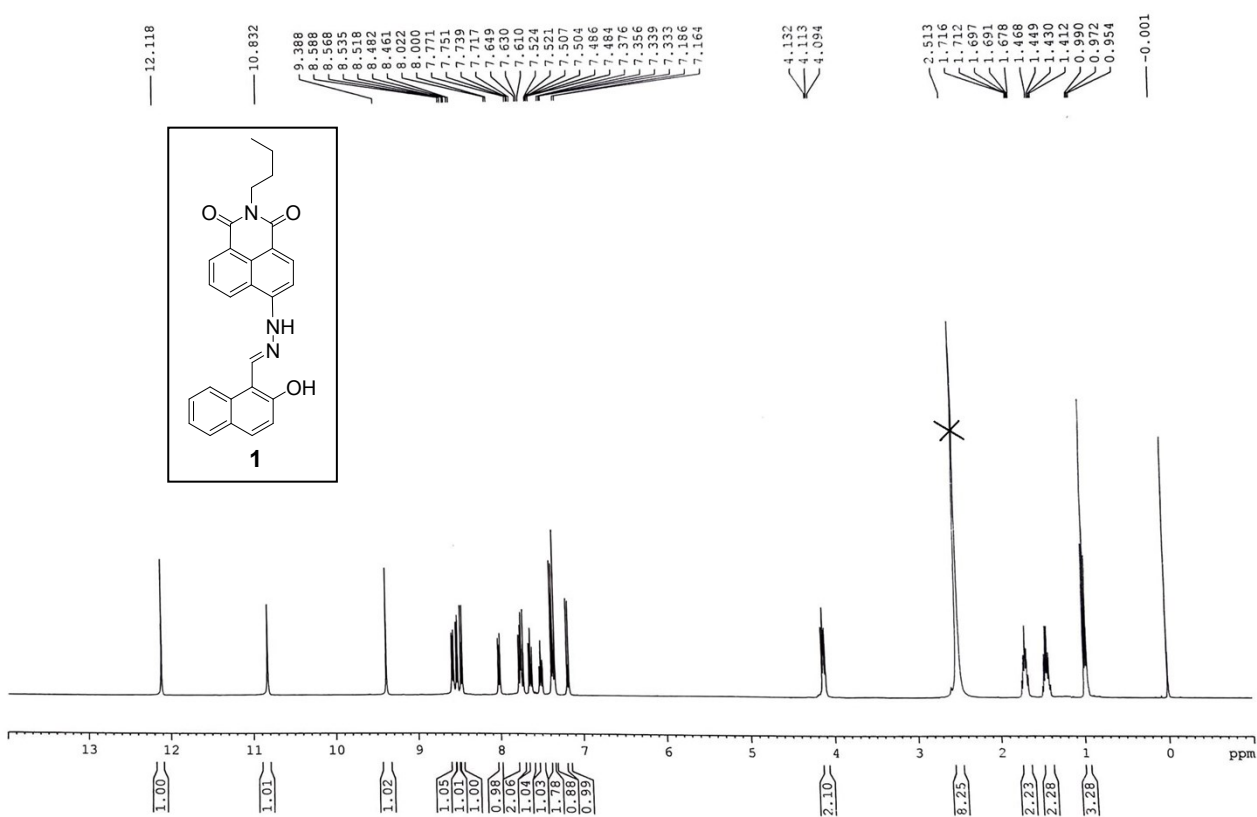

$^{13}\text{C}$  NMR ( $\text{CDCl}_3$  with 1 drop  $d_6$ -DMSO, 100 MHz) of **1**

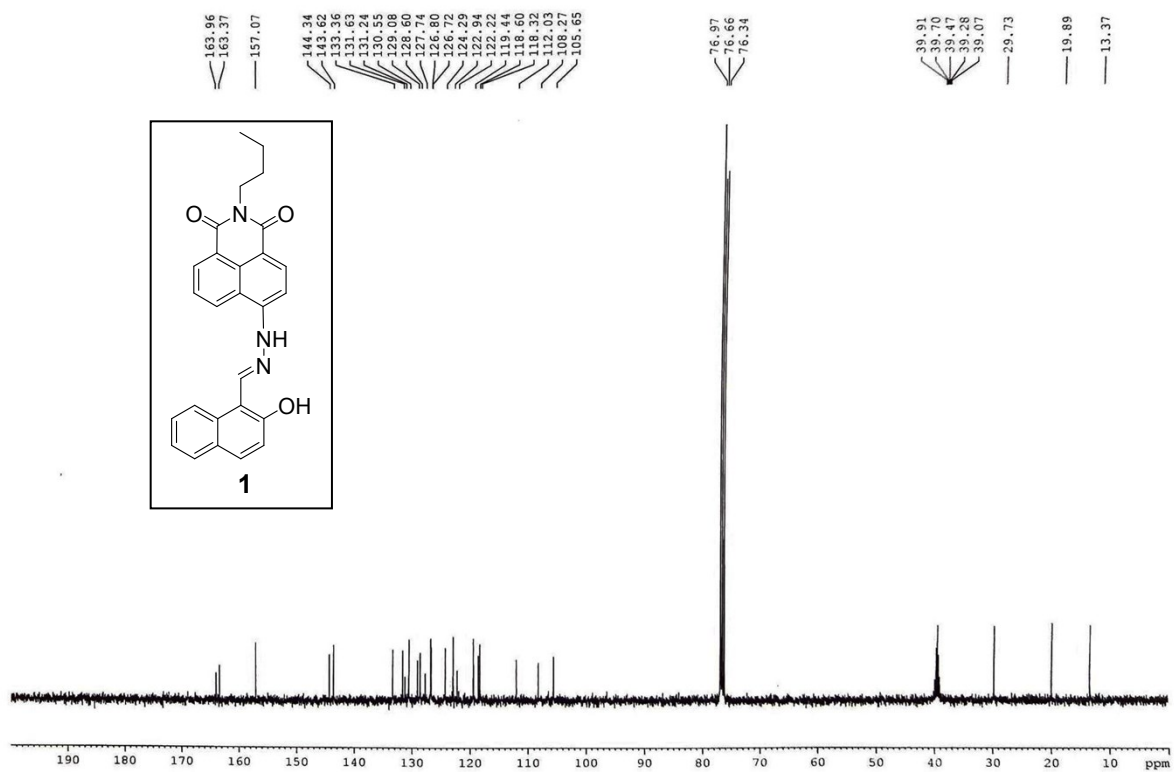

# Mass spectrum of 1.

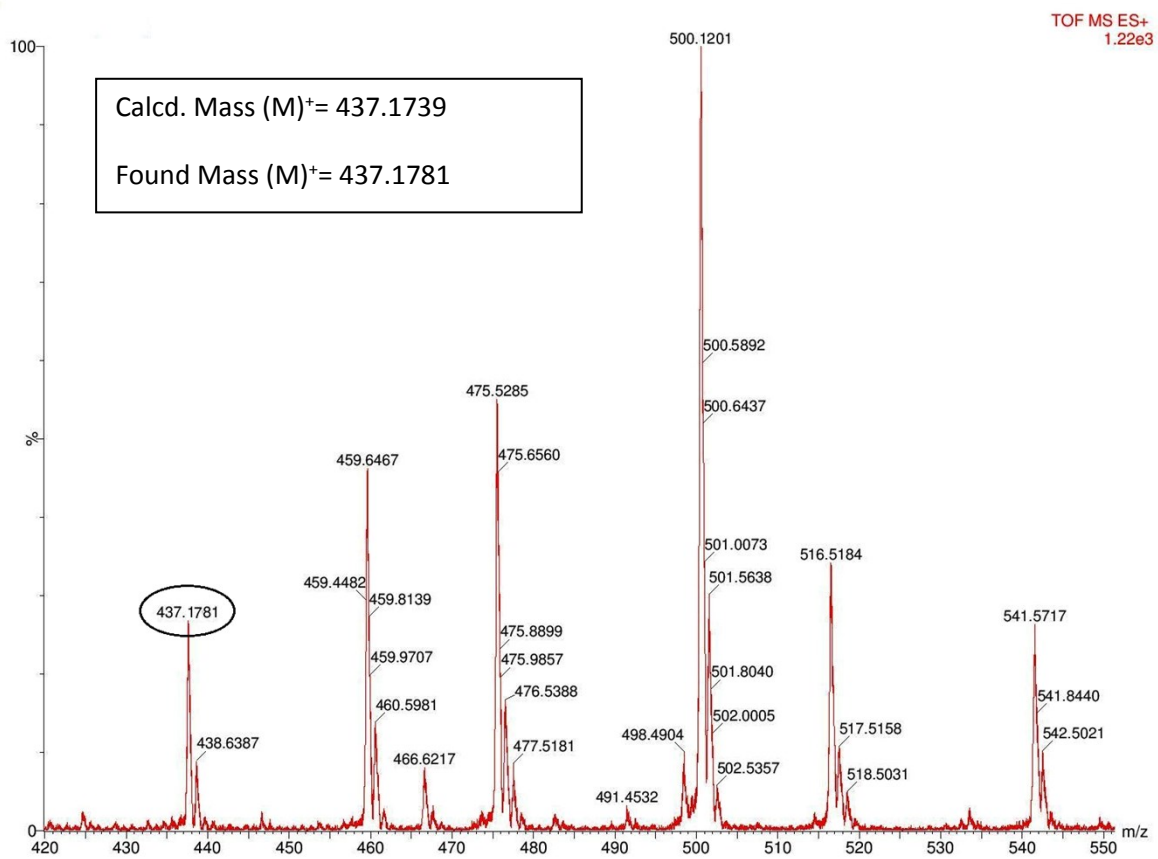

## Reference

1. T. Anand, G. Sivaraman and D. Chellappa, *J. Photochem. Photobiol. A*, 2014, **281**, 47.
2. Y. R. Bhorge, H. T. Tsai, K. F. Huang, A. J. Pape, S. N. Janaki, Y. P. Yen, *Spectrochim Acta A.*, 2014, **130**, 7.
3. H. M. Chawla, P. Goel and P. Munjal, *Tetrahedron Lett.*, 2015, **56**, 682.
4. S. Goswami, S. Maity, A. K. Das and A. C. Maity, *Tetrahedron Lett.*, 2013, **54**, 6631.
5. J. HY, P. GJ, N. YJ, C. YW, Y. GR and K. C, *Dyes. Pigm.*, 2014, **109**, 127.
6. N. Kaura, J. Singha, G. Dhaka, R. Rani and V. Luxami, *Supramol. Chem.*, 2015, **27**, 453.
7. S. A. Lee, J. J. Lee, J. W. Shin, K. S. Min and C. Kim, *Dyes. Pigm.*, 2015, **116**, 131.
8. N. Singh, N. Kaur, B. McCaughan and J. F. Callan, *Tetrahedron Lett.*, 2010, **51**, 3385.
9. P. Singh, H. Singh, G. Bhargava and S. Kumar, *J. Mater. Chem. C*, 2015, **3**, 5524.
10. J. S. Wu, P. F. Wang, X. H. Zhang and S. K. Wu, *Spectrochim Acta. A*, 2006, **65**, 749.
11. H. Xu, X. Wang, C. Zhang, Y. Wu and Z. Liu, *Inorg. Chem. Commun.*, 2013, **34**, 8.
12. N. Narayanaswamy and T. Govindaraju, *Sensor Actuat. B-Chem.*, 2012, **161**, 304.
13. X. Cao, Y. Li, Y. Yu, S. Fu, A. Gao and X. Chang, *Nanoscale*, 2019, **11**, 10911.
14. B. Naskar, R. Modak, D. K. Maiti, A. Bauzá, A. Frontera, P. K. Maiti, S. Mandal and S. Goswami, *RSC Adv.*, 2017, **7**, 11312.
15. G. T. Tigineh and L.-K. Liu, *Bull. Chem. Soc. Ethiop.*, 2017, **31**, 31.
16. J. –L. Zhong, X. –J. Jia, H. –J. Liu, X. –Z. Luo, S. –G. Hong, N. Zhanga and J. –B. Huang, *SoftMatter*, 2016, **12**, 191.
17. J.–F. Chen, Q. Lin, H. Yao, Y. –M. Zhang and T. –B. Wei, *Mater. Chem. Front.*, 2018, **2**, 999.
18. A. Panja and K. Ghosh, *Mater. Chem. Front.*, 2018, **2**, 1866.
19. A. Panja and K. Ghosh, *Mater. Chem. Front.*, 2018, **2**, 2286.
20. H. Jain, N. Deswal, A. Joshi, C. N. Ramachandran and R. Kumar, *Anal. Methods*, 2019, **11**, 3230.
